# Supplementary material
Source: PubMed Central journal article supplement (PMC3295293)
Supplement: 1109407109_pnas.201109407SI.pdf [file 1109407109_pnas.201109407SI.pdf]

# Supporting Information

Pennetier et al. 10.1073/pnas.1109407109

## SI Materials and Methods

**Fly Strains.** *w*<sup>1118</sup> (wt), dad-GFP (J. Casanova, Institute de Biologia Molecular de Barcelona, Barcelona, Spain), UAS-shmiRdpp2 (B. Haley, University of California, Berkeley, CA), UASdmyc (C. Benassayag, Centre de Biologie du Développement, Université Toulouse III, Toulouse, France), *gbb1* and *gbb4* (K. Wharton, Brown University, Providence, RI), UAS-dsCol (S. Thor, Linköping University, Linköping, Sweden), *wit*<sup>A12</sup>, and *wit*<sup>B11</sup>. *dppHR56* is a thermosensitive allele. *dppHR92/dppHR56* hypomorphic mutants were grown at 18 °C until the L1 stage before shifting to 29 °C. Other strains were provided by the Bloomington and the Vienna *Drosophila* RNAi stock centers.

**Antibodies.** Staining procedures were performed as described elsewhere (8, 45), using rabbit anti-GFP (1/500; Torrey Pines); anti-β-galactosidase (1/2,000; Promega); anti-Mad (1/3,000; C. Heldin, Ludwig Institute of Cancer Research, Uppsala, Sweden); anti-Dmyc (1/50; D. Stein, The University of Texas at Austin, Austin, TX); anti-H3P (1/200; Upstate Biotechnology); mouse anti-proPO (1/200; T. Trenczek, Justus-Liebig-University Gießen, Giessen, Germany); anti-P1 (1/30; I. Ando, Institut of Genetics, Biological Research Center of the Hungarian Academy of Science, Szeged, Hungary); and anti-Antp and anti-Dlp (1/50; Hybridoma Bank).

**Plasmid Constructions.** *dpp*, *tkv*, and *wit* genomic fragments, 2,318, 1,023, and 960 bp long, respectively, were PCR-amplified and cloned in pGEM-T Easy (Promega) to make RNA probes. Primers were as follows: *dpp* sense, 5'-CAAGGAGGCGTCATCAAG-3'; *dpp* anti-sense, 5'-CACCAGCAGTCCGTAGTTGC-3'; *tkv* sense, 5'-TATCCACCGGATTGGAAGAA-3'; *tkv* anti-sense, 5'-GCCATGTCTGATGGCTACAA-3'; *wit* sense, 5'-CAGTTGGGCGAAGAGAAGTC-3'; and *wit* anti-sense: 5'-CGC-ACTACACGCTAGGATGA-3'. T7 and SP6 RNA polymerases (Roche) were used for in vitro transcription of *dpp* and *wit* and *tkv*, respectively.

**Fly Genotypes.** The fly genotypes in Fig. 1 were as follows: dad-GFP (Fig. 1A–B'); wt (Fig. 1C and C'); col > UAS-mCD8GFP > UAS-*tkv*<sup>DN</sup> (Fig. 1D); *wit*<sup>B11</sup>/*wit*<sup>A12</sup> (Fig. 1E); col > UAS-mCD8GFP (Fig. 1G); col > UAS-mCD8GFP > UAS-*tkv*<sup>DN</sup>

(Fig. 1H); col > UAS-mCD8GFP; dome-MESO (Fig. 1K); col > UAS-mCD8GFP > UAS-*tkv*<sup>DN</sup>; dome-MESO (Fig. 1L); col > UAS-mCD8GFP (Fig. 1N); col > UAS-mCD8GFP > UAS-*tkv*<sup>DN</sup> (Fig. 1O); and *wit*<sup>B11</sup>/*wit*<sup>A12</sup> (Fig. 1M–P). The fly genotypes in Fig. 2 were as follows: col > UAS-mCD8GFP (Fig. 2A); *dlp*<sup>20</sup>FRT2A/*dlp*<sup>20</sup>FRT2A (Fig. 2B); col > UAS-Dicer2 (Fig. 2C); col > UAS-Dicer2 > UAS-dsdpp (Fig. 2D); col > UAS-Dicer2 > UAS-mCD8GFP > UAS-dscol; dome-MESO (Fig. 2E); and col > UAS-Dicer2 > UAS-dscol (Fig. 2G). The fly genotypes in Fig. 3 were as follows: col > UAS-Dicer2 > UAS-dscol; dad-GFP (Fig. 3A–A'); col > UAS-dicer2 > UAS-mCD8GFP > dscol (Fig. 3B–B'); HhF4-GFP (Fig. 3C–C'); col > GFP (Fig. 3D); HhF4-GFP; col > UAS-dicer2 > UAS-dscol (Fig. 3E–E'); *pcol* > UAS-dicer2 > UAS-dscol > UAS-mCD8GFP (Fig. 3F); HhF4-GFP; *pcol* > UAS-*tkv*<sup>DN</sup> (Fig. 3G–G'); and col > UAS-*tkv*<sup>DN</sup> > UAS-mCD8GFP (Fig. 3H). The fly genotypes in Fig. 4 were as follows: col > UAS-mCD8GFP (Fig. 4A and B); col > UAS-mCD8GFP > UAS-*tkv*<sup>DN</sup> (Fig. 4C); col > UAS-mCD8-GFP > UAS-dmyc; dome-MESO (Fig. 4D); col > UAS-mCD8-GFP > UAS-dmyc (Fig. 4E); and col > UAS-mCD8-GFP > UAS-*tkv*<sup>DN</sup> > UAS-dsmyc; dome-MESO (Fig. 4F). The fly genotypes in Fig. 5 were as follows: col > UAS-mCD8GFP > wg; dome-MESO (Fig. 5A); col > UAS-mCD8GFP > UAS-wg > UAS-dsmyc; dome-MESO (Fig. 5B); col > UAS-mCD8-GFP > UAS-dTCF<sup>DN</sup>; dome-MESO (Fig. 5C); and col > UAS-mCD8-GFP > UAS-dTCF<sup>DN</sup> > UAS-*tkv*<sup>DN</sup> dome-MESO (Fig. 5D).

The fly genotypes in Fig. S1 were as follows: *tkv1/tkv8* (Fig. S1 A, E, and I); *dppHR92/dppHR56* (Fig. S1 B, F, and J); *punt10460/punt135* (Fig. S1C); *gbb1/gbb4* (Fig. S1D); and col > UAS-dicer2 > UAS-dsdpp (Fig. S1 G–K). The fly genotypes in Fig. S2 were as follows: wt (Fig. S2 A and B) and *dlp*<sup>20</sup>FRT2A (Fig. S2 C and D). The fly genotypes in Fig. S3 were as follows: col > UAS-mCD8GFP (Fig. S3 A–A' and C–C') and col > UAS-mCD8GFP > UAS-*tkv*<sup>DN</sup> (Fig. S3 B–B' and D–D'). The fly genotypes in Fig. S4 were as follows: col > UAS-mCD8GFP (Fig. S4A); col > UAS-mCD8GFP > UAS-Col (Fig. S4B); col (Fig. S4C); col > UAS-col (Fig. S4D); col > UAS-mCD8GFP; dome-MESO (Fig. S4E); and col > UAS-col > UAS-mCD8GFP; dome-MESO (Fig. S4F).

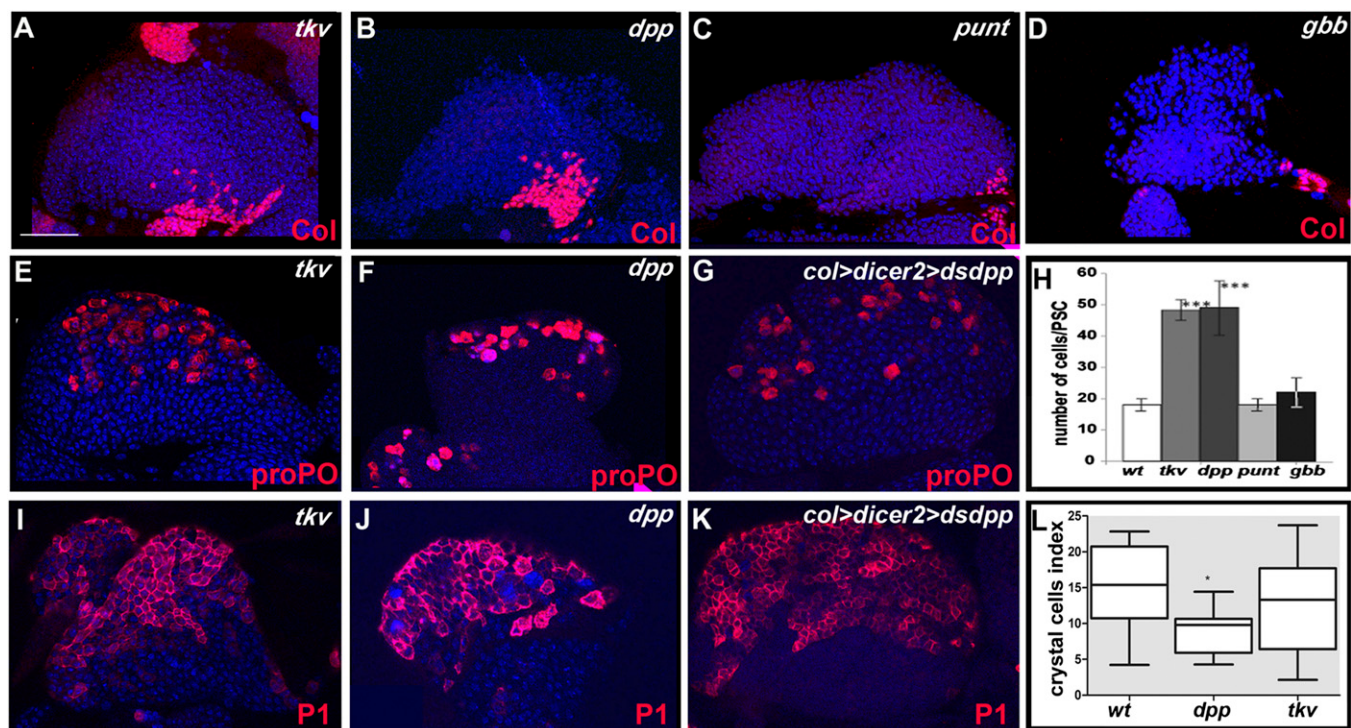

**Fig. S1.** The BMP signaling pathway controls PSC cell number. (A–G and I–K) LGs of hypomorphic mutants for either *tkv* (A, E, and I), *dpp* (B, F, and J), *punt* (C), or *gbb* (D) or expressing *dsdpp* RNA in the PSC (*col > dicer2 > dsdpp*) (G and K), stained for Col (A–D), proPO (E–G), and P1 (I–K); nuclei are labeled by Topro (blue). (Scale bar: 80  $\mu$ m.) (H) An increased number of PSC cells is observed in *tkv* and *dpp* mutants. (L) Crystal cell numbers relative to the volume of the anterior lobes.

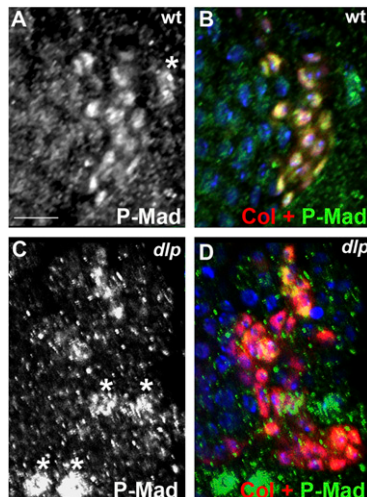

**Fig. S2.** Activity of the BMP pathway is impaired in *dlp* mutant LGs. (A–D) Immunostaining of wt (A and B) and *dlp* mutant (C and D) LGs for P-Mad (white in A and C; and green in B and D) and Col (red in B and D). A strong decrease in P-Mad accumulation is observed in *dlp* mutant PSCs. White stars indicate pericardial cells. Topro (blue) labels nuclei (B and D). (Scale bar: 20  $\mu$ m.)

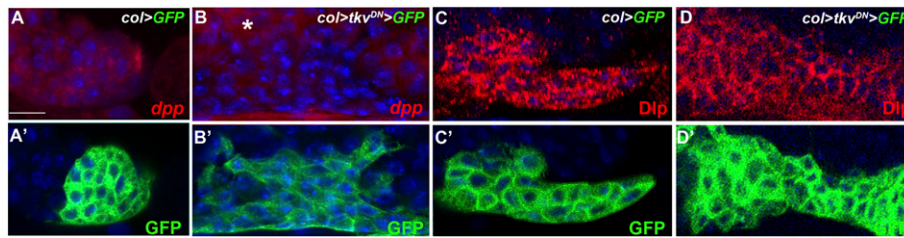

**Fig. S3.** Inactivation of BMP signaling leads to a strong decrease of *dpp* expression in PSC cells. (A–B') Fluorescent in situ hybridizations for *dpp* (red) in *col > GFP* (A) and *col > tkv<sup>DN</sup> > GFP* (B) LGs. *dpp* is down-regulated in the oversized PSC (B), which forms in absence of Dpp signaling, while maintained in other LG cells (white asterisk). (C and D) Dlp immunostaining of *col > GFP* (C) and *col > tkv<sup>DN</sup> > GFP* (D) LGs. The PSC region is shown in green (A', B', C', and D'). Topro (blue) labels nuclei. (Scale bar: 20  $\mu$ m.)

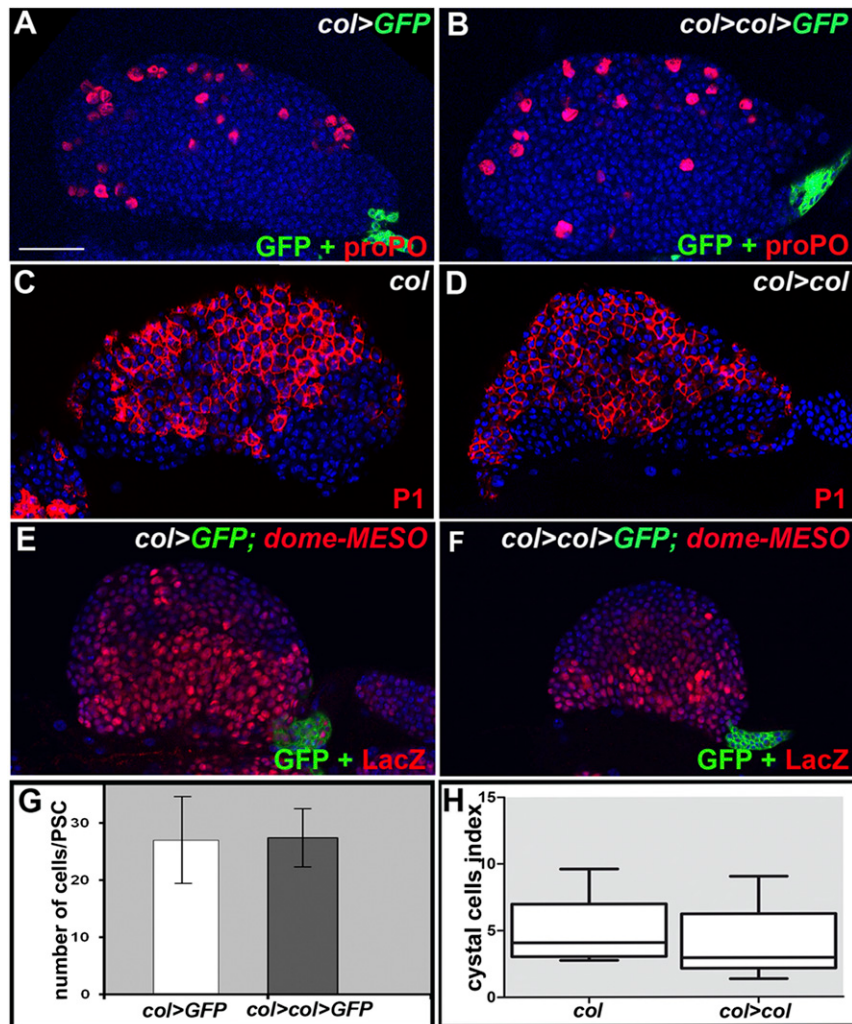

**Fig. S4.** No LG defects are observed upon Col overexpression in PSC cells. (A–F) Immunostaining of wt (A, C, and E) and *col > col* (B, D, and F) LGs for crystal cells [proPO (A and B)], plasmotocytes [P1 (C and D)], and prohemocytes [LacZ (E and F)]. (G and H) No change in either the PSC cell number (G) or crystal cell index (H) is observed. Nuclei are labeled by Topro (blue). (Scale bar: 80  $\mu$ m.)
